# Supplementary material for: Impact of hypoxia stress on the physiological responses of sea cucumber Apostichopus japonicus: respiration, digestion, immunity and oxidative damage
Source: PeerJ. 2018 Apr 27;6:e4651. doi: 10.7717/peerj.4651 (PMC5926553; doi:10.7717/peerj.4651)
Supplement: Supplemental Information 3 [file peerj-06-4651-s003.xlsx]

## Sheet: Sheet1
DO levels (mg/L)	ACP	AKP	GSH_PX	HSP70	AMS	SOD	TRY	LDH	LZM	PEP	SDH
8	0.917385	0.214805	1.06356	0.438637	9.12965	3.53351	0.0148273	1.36292	0.918786	0.745149	5.45583
8	0.976438	0.196296	0.978674	0.460445	8.51827	3.5091	0.0151389	1.4208	0.799849	0.596916	5.88809
8	1.13729	0.20042	1.10107	0.438637	4.47088	4.00305	0.01739	1.3535	0.869224	0.68094	6.22382
8	1.01087	2.51594	2.65535	2.49857	1.59169	0.582811	14.3641	1.15405	1.33589	1.40991	5.64823
8	0.983229	2.53344	1.38405	2.28327	0.933395	0.555208	11.192	1.19474	1.29936	1.3905	5.72708
8	0.962995	2.6594	1.02023	2.34746	0.933395	0.500381	9.74323	1.17829	1.07014	1.37135	5.84742
8	1.03929	2.14518	0.721414	1.07259	0.13684	0.532591	5.91509	0.627071	1.07758	1.86038	0.0305602
8	1.03211	1.80388	0.654697	0.959996	0.13684	0.532591	5.40539	0.614166	0.944616	0.821083	0.0295193
8	0.956343	1.80388	0.492741	0.818526	0.137792	0.438637	5.11382	0.609923	0.828056	0.804185	0.0293153
4	1.04652	0.476682	2.2484	0.624641	0.303667	0.255448	0.935883	1.20305	0.658749	0.911049	2.17016
4	1.00389	0.476682	2.06895	0.616042	0.330005	0.246746	0.916623	1.17829	0.681979	0.545481	2.3421
4	1.02498	0.486698	2.05466	0.547564	0.27943	0.251931	0.955548	1.08425	0.715885	0.560816	2.44155
4	0.8923	1.23208	2.34388	1.45508	0.747715	2.73416	0.00299008	1.58744	0.720864	0.364907	6.26711
4	0.8679	1.14163	2.31161	1.29334	0.438473	2.48131	0.00237872	1.6096	0.691499	0.342838	6.39879
4	0.861905	1.09513	2.20213	1.17373	0.417706	2.51594	0.00239526	1.58744	0.681979	0.347624	6.48812
4	0.21251	0.351379	1.35557	0.275686	0.120789	0.0764733	0.797966	0.247706	0.0986047	0.304729	0.0301395
4	0.280408	0.438637	1.77633	0.287394	0.128564	0.102316	0.781545	0.32235	0.132844	0.226189	0.0411718
4	0.232548	0.44476	1.77633	0.239999	0.0890377	0.0941497	0.734279	0.298686	0.131926	0.215476	0.0353487
2	2.13702	2.6594	3.20184	284.266	2.48038	3.70918	0.121111	0.943896	1.77498	2.72376	12.1073
2	2.07858	2.69652	2.98742	267.075	1.77838	3.63285	0.121953	0.886812	1.72644	1.50066	12.1073
2	2.25887	2.85027	2.40978	294.291	0.959637	3.86669	0.0917849	0.868562	1.83757	1.50066	12.1915
2	0.724772	3.07609	3.83413	254.426	4.7258	0.99385	0.044948	0.667435	0.772603	0.766098	1.79975
2	0.745149	3.05485	3.8608	256.195	3.48355	0.940239	0.0455754	0.6862	0.720864	0.478171	1.77498
2	0.644209	2.9304	3.20184	235.748	2.60369	0.450969	0.0394017	0.6447	0.725879	0.458693	1.64467
2	6.38904	2.0578	36.4766	113.072	17.5155	0.293432	0.0844593	5.41402	4.04966	174.321	4.88311
2	6.17141	1.85459	32.6475	114.651	18.5142	0.271891	0.0793514	3.7495	2.84376	145.573	4.81588
2	3.74665	1.6599	21.84	105.5	15.2481	0.241668	0.0686023	3.7495	2.82412	131.198	4.52463
